# Supplementary material
Source: publisher site journal article supplement (https://www.spandidos-publications.com/3444/downloadSupplementary)

Figure S1. GFI1 knockdown inhibits the expression of cell cycle regulatory- and epithelial-mesenchymal transition-associated genes. (A) mRNA expression levels of cyclin D1 and survivin were detected in siGFI1-transfected esophageal squamous cell carcinoma cells by RT-qPCR. (B) mRNA expression levels of the epithelial and mesenchymal markers E-cadherin, N-cadherin and vimentin were detected by RT-qPCR. \* $P < 0.05$  and \*\* $P < 0.01$  vs. control. GFI1, growth factor-independent 1; RT-qPCR, reverse transcription-quantitative PCR; si, small interfering RNA.

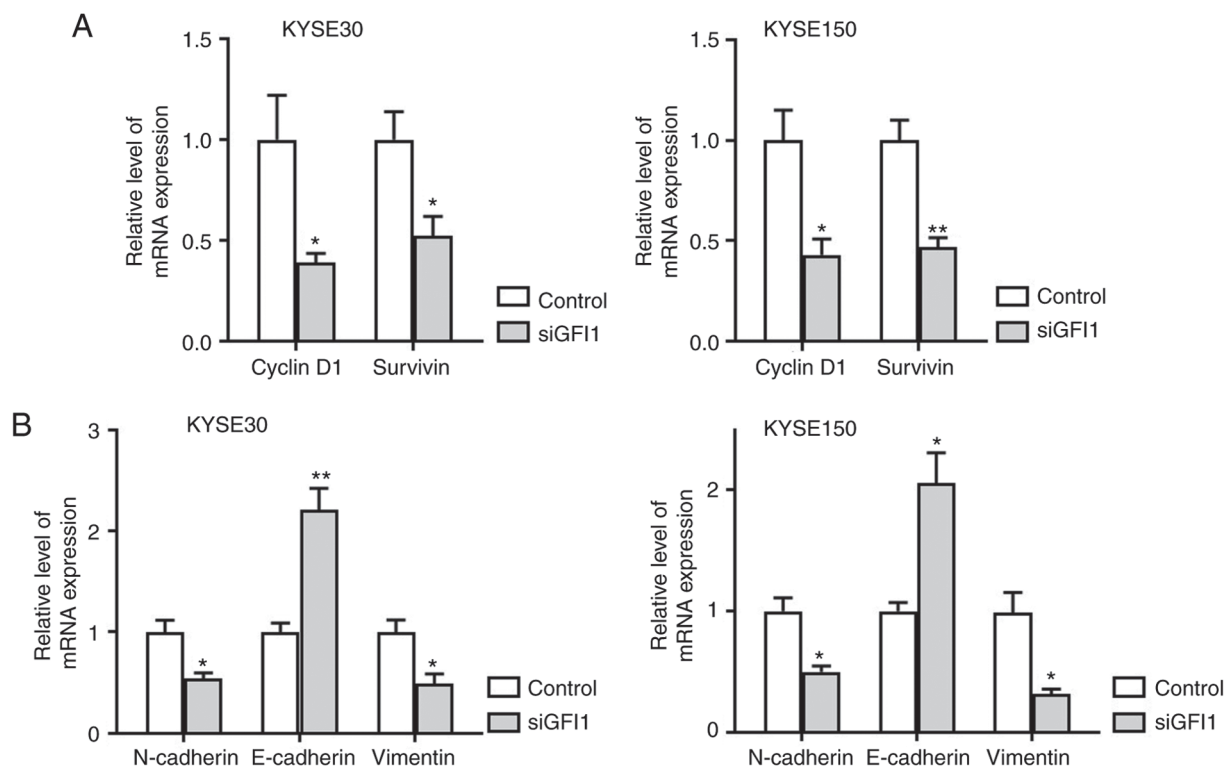

Figure S2. Efficiency of SOCS1 knockdown in ESCC cells using siRNA. (A-D) siSOCS1 was transfected into the (A and B) KYSE30 and (C and D) KYSE150 ESCC cell lines. The mRNA and protein expression levels of SOCS1 in ESCC cell lines were detected using reverse transcription-quantitative PCR and western blotting. \*\* $P < 0.01$  and \*\*\* $P < 0.001$  vs. control. siRNA/si, small interfering RNA; SOCS1, suppressor of cytokine signaling 1; ESCC, esophageal squamous cell carcinoma.

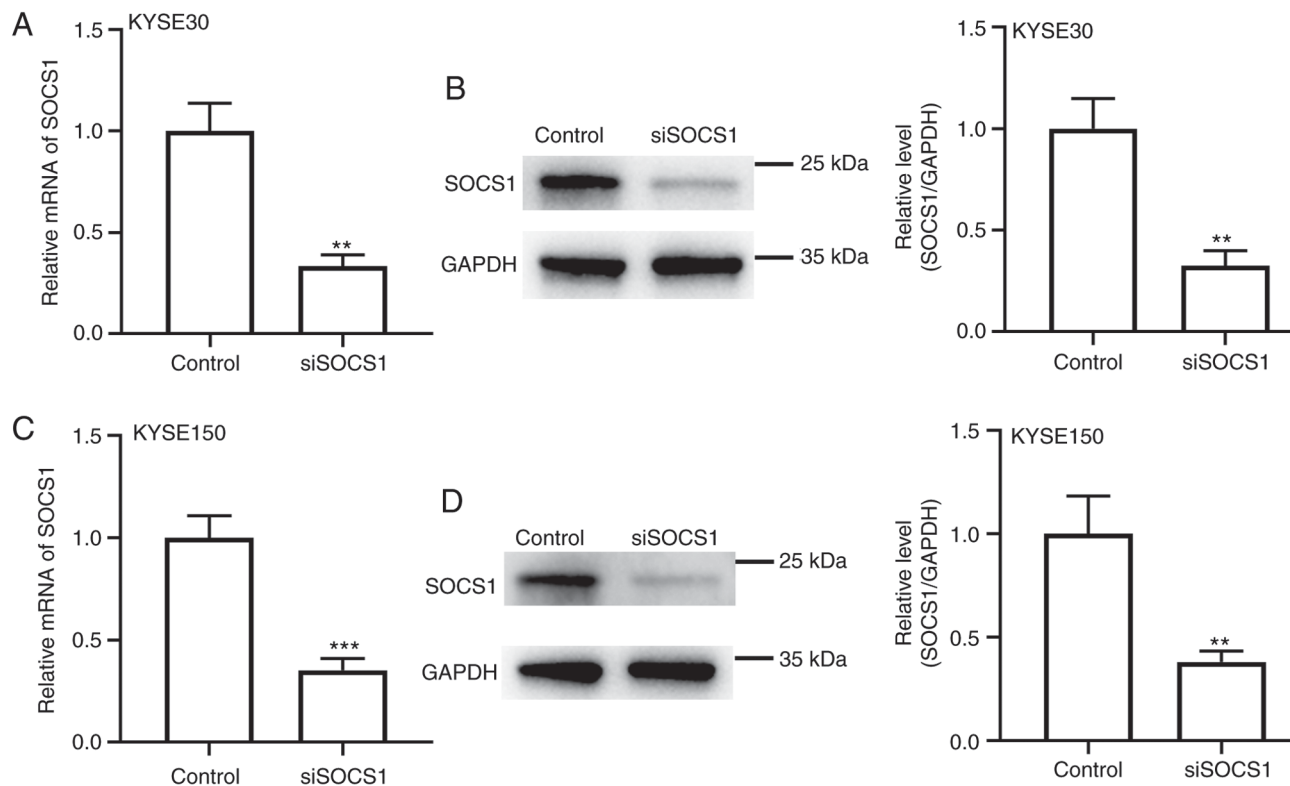

Supplement: Supplementary file 1 [file downloadSupplementary]
